# Supplementary material for: Effects of Environment Change Scenarios on the Potential Geographical Distribution of Cunninghamia lanceolata (Lamb.) Hook. in China
Source: MDPI journal article supplement (doi:10.3390/f15050830), 2024-05-09
Supplement: s1 [file s1]

Archive with 7 entries (7 files):
- Figures/Figure S1.pdf
- Figures/Figure S2.pdf
- Figures/Figure S3.pdf
- Tables/~$Table S3.xlsx
- Tables/Table S1.xlsx
- Tables/Table S2.xlsx
- Tables/Table S3.xlsx
