# Supplementary material for: Effects of Environment Change Scenarios on the Potential Geographical Distribution of Cunninghamia lanceolata (Lamb.) Hook. in China
Source: MDPI journal article supplement (doi:10.3390/f15050830), 2024-05-09
Supplement: s1 [file s1 › Figures/Figure S3.pdf]

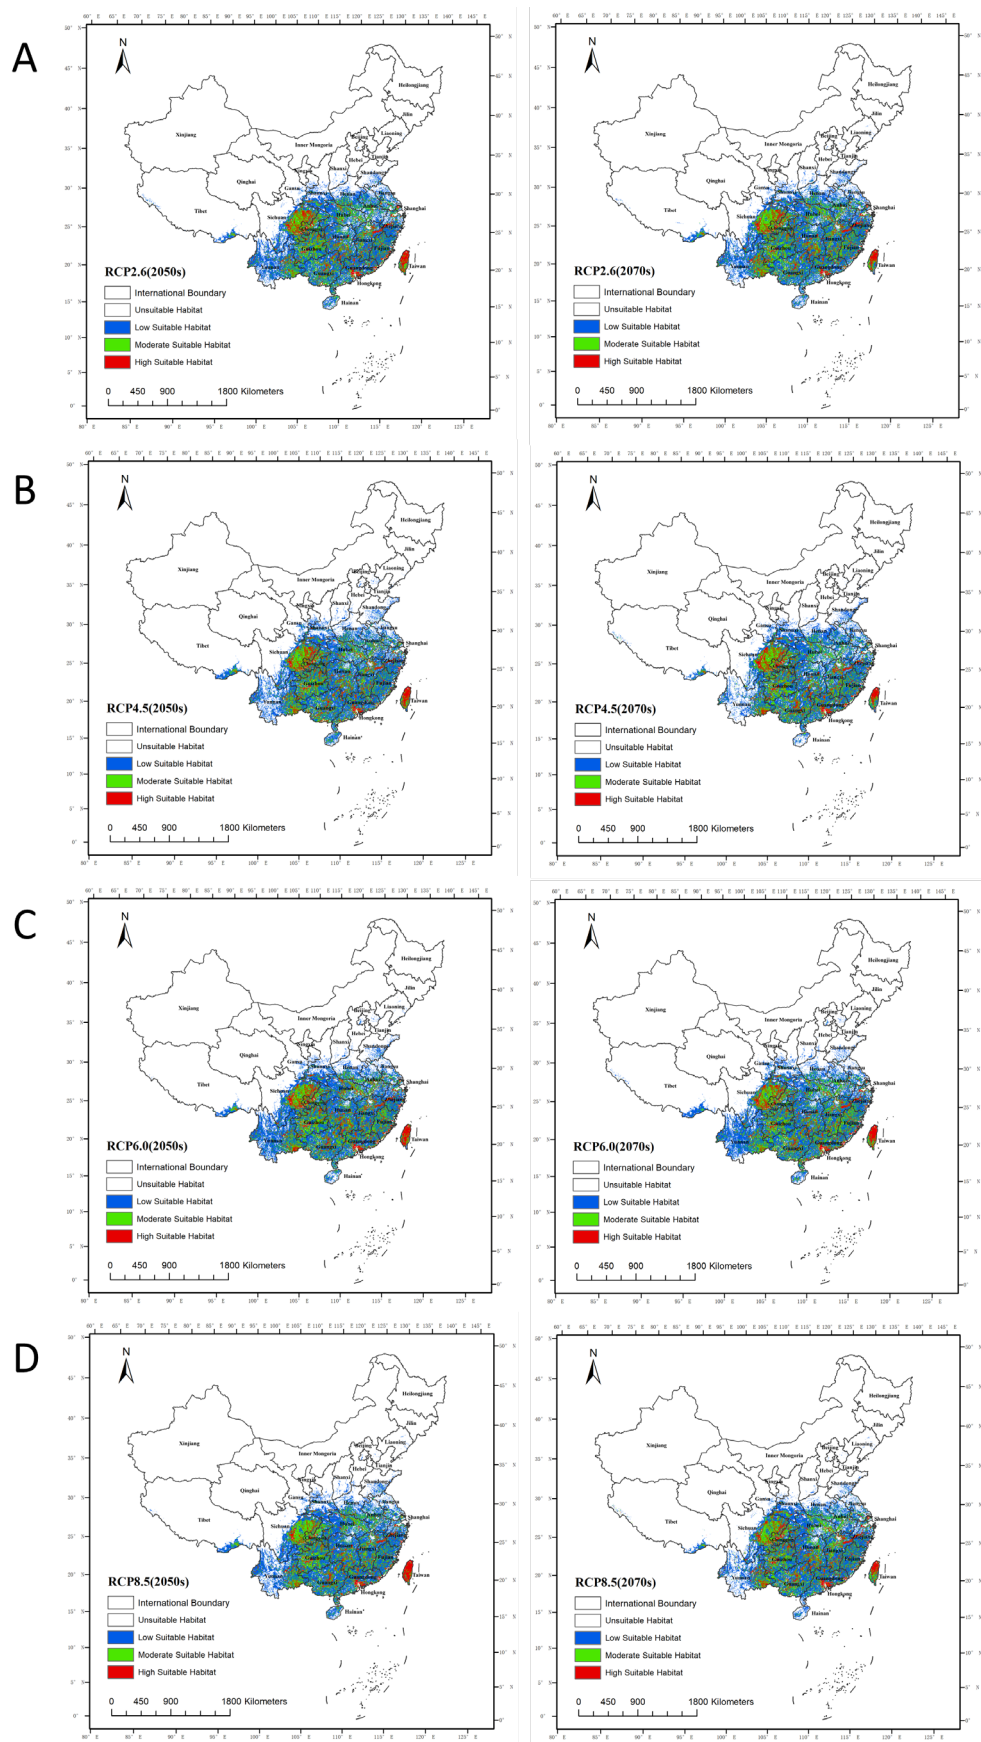

**Figure S3.** Distribution of *C. lanceolata* habitats in the 2050s and 2070s in the future under different carbon emission concentration scenarios, (A) RCP2.6 (B) RCP4.5 (C) RCP6.0 (D) RCP8.5.
