# Supplementary material for: Effects of Environment Change Scenarios on the Potential Geographical Distribution of Cunninghamia lanceolata (Lamb.) Hook. in China
Source: MDPI journal article supplement (doi:10.3390/f15050830), 2024-05-09
Supplement: s1 [file s1 › Tables/Table S1.xlsx]

## Sheet: Sheet1
Table S1. Ecological factors used in simulation
Data type	Ecological factor	Units
Climate factors	Mean annual temperature ( Bio1)	℃
	Mean monthly temperature range ( Bio2)	℃
	Isothermality ( Bio3)	/
	Temperature seasonality ( Bio4)	/
	Max temperature of warmest month ( Bio5)	℃
	Min temperature of coldest month ( Bio6)	℃
	Temperature annual range ( Bio7)	℃
	Mean temperature of wettest quarter ( Bio8)	℃
	Mean temperature of driest quarter ( Bio9)	℃
	Mean tmperature of warmest quarter ( Bio10)	℃
	Mean temperature of coldest quarter ( Bio11)	℃
	Annual precipitation ( Bio12)	mm
	Precipitation of wettest month ( Bio13)	mm
	Precipitation of driest month ( Bio14)	mm
	Precipitation seasonality ( Bio15)	mm
	Precipitation of wettest quarter ( Bio16)	mm
	Precipitation of driest quarter ( Bio17)	mm
	Precipitation of warmest quarter ( Bio18)	mm
	Precipitation of coldest quarter ( Bio19)	mm
Soil factors	Volume percentage of gravel in the topsoil ( T_GRAVEL)	%vol.
	Percentage of sand in the topsoil ( T_SAND)	% wt.
	Percentage of silt in the topsoil ( T_SILT)	% wt.
	Percentage of clay in the topsoil ( T_CLAY)	% wt.
	Texture class name and code ( T_USDA_TEX_ CLASS)	name
	Cation exchange capacity ( T_REF_BULK_DENSITY)	kg/dm3
	Percentage of organic carbon in the topsoil ( T_OC)	% weight
	Soil reaction of topsoil ( T_PH_H2O)	log(H+)
	Cation exchange capacity of the clay fraction in the topsoil ( T_CEC_CLAY)	cmol/kg
	Cation exchange capacity in the topsoil ( T_CEC_SOIL)	cmol/kg
	Base saturation in the topsoil ( T_BS)	%
	Calcium carbonate ( lime) content in the topsoil ( T_CACO3)	%
	Exchangeable sodium percentage in the topsoil ( T_ESP)	%
	Electrical conductivity of topsoil ( T_ECE)	dS/m
	Total exchangeable bases in the topsoil ( T_TEB)	cmol/kg
	Available water storage capacity in mm/m of the soil unit（AWC）	%
Terrain	Elevation	m
	Slope	%
	Aspect	°
Human activities	Global Human Footprint	/
