# Supplementary material for: Effects of Environment Change Scenarios on the Potential Geographical Distribution of Cunninghamia lanceolata (Lamb.) Hook. in China
Source: MDPI journal article supplement (doi:10.3390/f15050830), 2024-05-09
Supplement: s1 [file s1 › Tables/Table S2.xlsx]

## Sheet: Sheet1
Table S2. Contribution rate and permutation importance of environmental factors under current and other eight future scenarios
current times				RCP2.6-2050s				RCP2.6-2070s				RCP4.5-2050s				RCP4.5-2070s				RCP6.0-2050s				RCP6.0-2070s				RCP8.5-2050s				RCP8.5-2070s
Variable	Percent contribution	Permutation importance		Variable	Percent contribution	Permutation importance		Variable	Percent contribution	Permutation importance		Variable	Percent contribution	Permutation importance		Variable	Percent contribution	Permutation importance		Variable	Percent contribution	Permutation importance		Variable	Percent contribution	Permutation importance		Variable	Percent contribution	Permutation importance		Variable	Percent contribution	Permutation importance
Bio 12	41.3	40.1		Bio 12	48.6	62.5		Bio 12	41.3	60.7		Bio 12	42.2	44.3		Bio 12	40.3	48.9		Bio 12	37.6	60.7		Bio 12	45.3	53.8		Bio 12	50	58		Bio 12	47.9	64.3
Hfp	20	19.2		Hfp	18.6	17		Hfp	19.8	14.5		Hfp	17.2	16.4		Hfp	18.1	16.4		Hfp	18.2	15.4		Bio 6	20.7	9.8		Hfp	19.6	19.8		Bio 6	19.5	3.6
Bio 19	13.1	0.6		Bio 6	15.8	1.1		Bio 19	12.4	0.3		Bio 19	12.6	2.4		Bio 19	13.1	0.8		Bio 19	14.7	0.7		Hfp	17.2	13.9		Bio 6	12	0.2		Hfp	15.9	11.1
Bio 6	11.1	6.5		Bio 7	4.3	5.2		Bio 6	11.3	0.3		Bio 6	11.6	0.7		Bio 6	12.2	0		Bio 6	12.6	4		Bio 7	4.2	4.3		Bio 7	4.4	6.4		SlopeCI 3	4.3	3.6
Bio 11	3	1.6		SlopeCI 3	4	3.3		Bio 7	4.7	3		Bio 18	2.8	1.4		Bio 7	2.6	22.2		Bio 7	4.8	7.8		SlopeCI 3	2.6	2.7		Bio 19	3.2	0.4		Elevation	2.3	3.7
AspectCIU	3	2.4		Elevation	2.3	2.4		SlopeCI 3	2.4	1.4		SlopeCI 3	2.5	3.5		Bio 18	2.3	2.6		AspectCIU	2.7	1.5		Elevation	2.4	4.2		Bio 11	2.5	4.3		Bio 7	2.3	6.4
Bio 7	2.5	17.4		Bio 11	1.6	1.2		AspectCIU	2.3	1.9		Bio 11	2.5	5.1		SlopeCI 3	2.2	2		Bio 11	2.2	0.3		AspectCIU	2.2	1.6		AspectCIU	2.1	1.7		Bio 19	2.3	1.7
SlopeCI 3	1.7	1.6		AspectCIU	1.2	2.1		Elevation	1.9	4.8		AspectCIU	2.2	1.6		AspectCIU	2.1	0.5		Bio 3	2	0.4		Bio 19	2	1.4		Elevation	1.8	4.4		AspectCIU	1.8	1.1
Bio 18	1.3	1		T_USDA_TEX_ CLASS	0.8	0.3		Bio 11	1.6	6		Bio 7	2.1	13.2		Bio 3	2.1	0.8		Elevation	1.8	2.9		Bio 11	0.8	0.3		SlopeCI 3	1.7	1.8		Bio 11	1.4	0.1
Elevation	1.2	5.3		Bio 5	0.8	0.8		Bio 3	0.8	0.9		Elevation	1.5	4.8		Bio 11	2.1	0.2		SlopeCI 3	1.4	1		T_USDA_TEX_ CLASS	0.8	0.6		Bio 5	1.2	1.1		Bio 3	0.9	1
Bio 5	0.5	2.4		Bio 3	0.7	1.1		SlopeCI 1	0.5	0.4		Bio 3	1.1	0.8		Elevation	2.1	3.8		SlopeCI 1	0.7	1.4		Bio 3	0.7	0.7		Bio 3	0.8	0.7		Bio 18	0.8	1.5
Bio 3	0.4	0.8		SlopeCI 1	0.4	0.3		Bio 18	0.3	4.4		SlopeCI 1	0.7	1.2		Bio 5	0.4	1.5		T_TEB	0.5	0.2		Bio 18	0.5	2.8		SlopeCI 1	0.3	0.4		T_USDA_TEX_ CLASS	0.3	0.3
T_USDA_TEX_ CLASS	0.4	0.1		Bio 19	0.4	1		T_USDA_TEX_ CLASS	0.3	0.3		T_USDA_TEX_ CLASS	0.5	0.5		T_USDA_TEX_ CLASS	0.3	0.2		Bio 18	0.4	2.4		Bio 5	0.3	3		Bio 18	0.2	0.7		Bio 5	0.2	0.8
SlopeCI 1	0.2	0.3		Bio 18	0.4	1.6		T_TEB	0.2	0.2		Bio 5	0.3	3.9		SlopeCI 1	0.2	0.1		T_USDA_TEX_ CLASS	0.3	0.3		SlopeCI 1	0.2	0.7		T_USDA_TEX_ CLASS	0.1	0.2		SlopeCI 1	0.1	0.5
AspectCIE	0.2	0.5		T_TEB	0.2	0.2		Bio 5	0.2	1		T_TEB	0.2	0.1		T_TEB	0	0		Bio 5	0.1	0.8		T_TEB	0.1	0.1		T_TEB	0.1	0.1		T_TEB	0.1	0.1
T_TEB	0.1	0.2		AspectCIE	0	0		AspectCIE	0	0		AspectCIE	0	0		AspectCIE	0	0		AspectCIE	0	0		AspectCIE	0	0		AspectCIE	0	0		AspectCIE	0	0
