# Supplementary material for: Effects of Environment Change Scenarios on the Potential Geographical Distribution of Cunninghamia lanceolata (Lamb.) Hook. in China
Source: MDPI journal article supplement (doi:10.3390/f15050830), 2024-05-09
Supplement: s1 [file s1 › Tables/Table S3.xlsx]

## Sheet: Sheet1
Table S3. Areas of potential distribution under different climate scenarios of Cunninghamia lanceolata (Lamb.) Hook.
Period	Climate scenarios	Total suitable area /×104 km2		Low-level suitable area /×104 km2		Moderate suitable area /×104 km2		High suitable area /×104 km2
			No Hfp		No Hfp		No Hfp		No Hfp
Current	/	193.78(20.19%)	218.65(22.78%)	110.076	88.0942	58.5518	83.1887	25.1486	47.3631
2050S	RCP2.6	206.29(21.49%)	224.17(23.35%)	120.954	98.6979	59.9017	85.3597	25.4384	40.1106
	RCP4.5	207.39(21.60%)	215.28(22.43%)	122.091	89.6054	58.863	82.3893	26.4398	43.2873
	RCP6.0	214.43(22.34%)	223.64(23.30%)	122.749	93.136	62.5928	84.6144	29.0847	45.8859
	RCP8.5	208.31(21.70%)	226.83(23.63%)	125.71	100.181	59.2258	82.4302	23.3698	44.2175
2070S	RCP2.6	209.27(21.80%)	228.66(23.82%)	120.611	100.315	62.5324	83.188	26.1303	45.1602
	RCP4.5	197.64(20.59%)	226.18(23.56%)	113.703	100.533	58.397	80.3492	25.5451	45.3007
	RCP6.0	208.59(21.73%)	224.82(23.42%)	120.437	100.45	62.2887	85.2619	25.8671	39.1074
	RCP8.5	199.72(20.80%)	226.83(22.57%)	113.632	93.602	59.4926	81.6619	26.5963	41.4303
Note: The percentage in the table is the total suitable area/China land area.
