# Supplementary figures and images for: Effects of Environment Change Scenarios on the Potential Geographical Distribution of Cunninghamia lanceolata (Lamb.) Hook. in China
Source: MDPI journal article supplement (doi:10.3390/f15050830), 2024-05-09

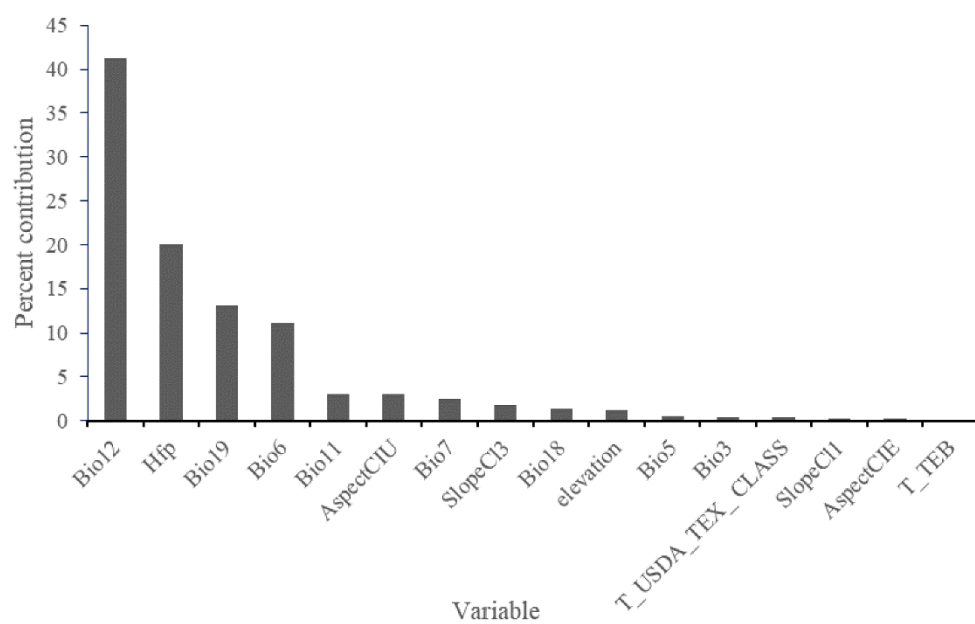

**Figure S1.** Contribution rate of environmental factors.

Supplement: s1 [file s1]

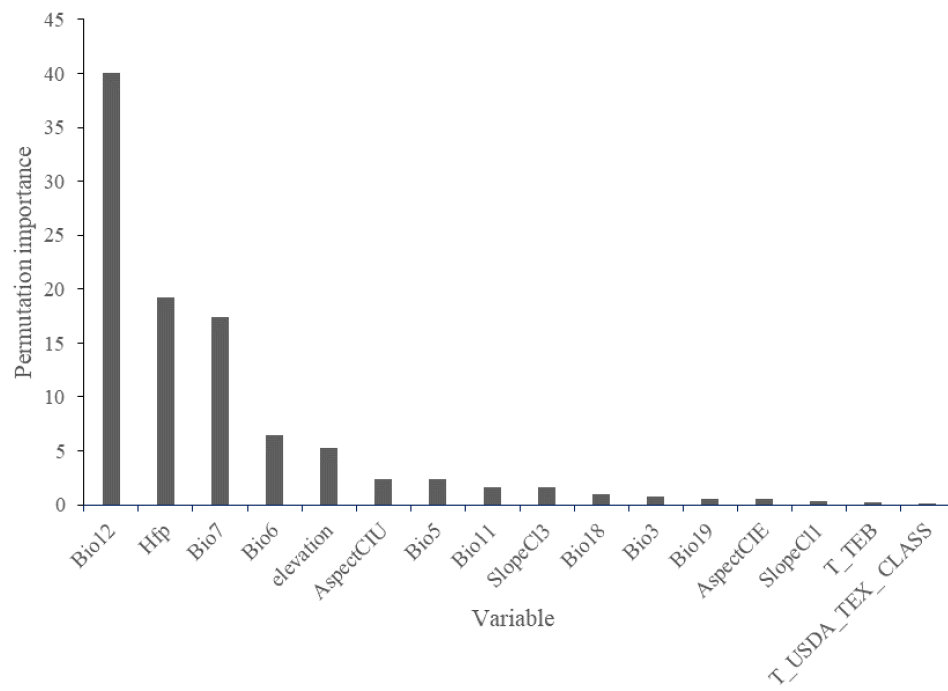

**Figure S2.** Permutation importance of environmental factors.

Supplement: s1 [file s1 › Figures/Figure S2.pdf]
